## CORRESPONDENCE

15. McLaren AD, Stockwell MC, Reid VT: Anaesthetic techniques for surgical correction of fractured neck of femur: A comparative study of spinal and general anaesthesia in the elderly. *Anaesthesia* 33:10-14, 1978

16. Valentin N, Lomholt B, Jensen JS, Hejgaard N, Kreiner S: Spinal or general anaesthesia for surgery of the fractured hip? A prospective study of mortality in 578 patients. *Br J Anaesth* 58:284-291, 1986

17. Davis FM, Woolner DF, Frampton C, Wilkinson A, Grant A, Harrison RT, Roberts MT, Thadaka R: Prospective, multi-center trial

of mortality following general or spinal anaesthesia for hip fracture surgery in the elderly. *Br J Anaesth* 59:1080-1088, 1987

18. Racle JP, Benkhadra A, Poy JY, Gleizal B, Gaudray A: Etude comparative de l'anesthesie generale et de la rachianesthesie chez la femme agee dans la chirurgie de la hanche. *Ann Fr Anesth Reanim* 5:24-30, 1986

(Accepted for publication May 7, 1993.)

Anesthesiology  
79:408, 1993

© 1993 American Society of Anesthesiologists, Inc.  
J. B. Lippincott Company, Philadelphia

## Anesthetic Care and Management of Patients Who Are Deaf and Mute

**To the Editor:**—Shulman and Polepalle<sup>1</sup> described problems involved in providing anesthesia for a deaf-mute patient undergoing prostate surgery.

The case report reached a large number of practitioners who may at some time have a significant impact on deaf individuals undergoing a surgical procedure. As such, this report should have been a vehicle to educate these professionals about a group of people with whom most of us have not been trained to interact.

Instead, the few useful recommendations for communicating with deaf patients that Shulman and Polepalle offer in the article are lost amid stereotypes and misinformation gleaned from a limited number of research references.

Although stating, "The association between hearing loss and paranoid states has not been demonstrated conclusively in any study," one is left with the distinct feeling that there is a relationship between deafness and paranoia. If no relationship has been proved, why bring the issue to the forefront? The impact of deafness on an individual is complex. Just as you objectively evaluate any hearing patient you may have, each deaf patient must be evaluated as the individual he or she is. Regardless of a person's hearing ability or level of education, surgery is a threatening, anxiety-producing situation. A patient's reaction to this stress is based on his or her perspective rather than on the facts. We have seen hearing patients become agitated in operating room situations when clear communication was lacking. This stress is heightened by a communication obstacle such as deafness. The feelings of being powerless and isolated can be overwhelming, and the patient's subsequent behavior could be perceived by others as "paranoia."

The authors make many statements about American Sign Language (ASL) that are incorrect and leave the reader with the belief that ASL is an inferior method of communication. In fact, ASL is recognized as a legitimate language possessing every element of a spoken lan-

guage, including a complex vocabulary, grammar, syntax, and substructure.

Shulman and Polepalle learned from their clinical experience with a deaf patient that communication is paramount, and this communication ensures that the surgical experience will be successful from every participant's viewpoint. As health-care providers in the operating room, it is our responsibility to provide pre-, intra-, and post-operative information and constant feedback to our patients. This communication allows any patient to retain a degree of control over their circumstances. To this end, the deaf patient must be allowed the right to communicate in whichever mode he or she is most comfortable. This may be *via* one of the manual signing languages, ASL being the most common, or by speech reading or finger spelling. Clearly, the use of a qualified interpreter to facilitate this process cannot be overemphasized.

**Frances L. Snyder, R.N., B.S.N.**  
Operating Room Nurse  
Sign Language Interpreter

**Jochen F. Dwersteg, M.D., F.R.C.P.C.**  
Anesthesiologist

Whidbey General Hospital  
40 North Main Street  
Coupeville, Washington 98239

## Reference

1. Shulman SM, Polepalle: Spinal anesthesia for a deaf-mute patient undergoing prostatic surgery. *ANESTHESIOLOGY* 78:590-591, 1993

(Accepted for publication May 7, 1993.)
